# Supplementary material for: Palmitoylation-driven PHF2 ubiquitination remodels lipid metabolism through the SREBP1c axis in hepatocellular carcinoma
Source: PubMed Central journal article supplement (PMC10570296; doi:10.1038/s41467-023-42170-0), 2023-10-12
Supplement: 41467_2023_42170_MOESM2_ESM.pdf [file 41467_2023_42170_MOESM2_ESM.pdf]

# Description of Additional Supplementary Information

**File name:** Supplementary Data 1

**Description:** PHF2-interacting proteins detected using LC-MS in HepG2 cells.

**File name:** Supplementary Data 2

**Description:** The exact p-values of main and supplementary figures.
