# Supplementary material for: Palmitoylation-driven PHF2 ubiquitination remodels lipid metabolism through the SREBP1c axis in hepatocellular carcinoma
Source: PubMed Central journal article supplement (PMC10570296; doi:10.1038/s41467-023-42170-0), 2023-10-12

# The Source Data of main figures

**Fig. 1**

**b**

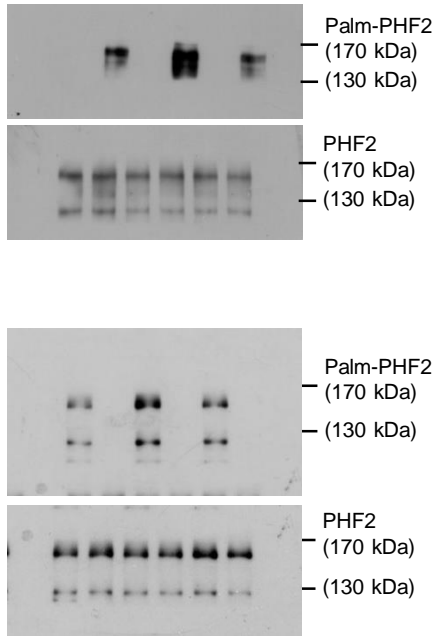

**d**

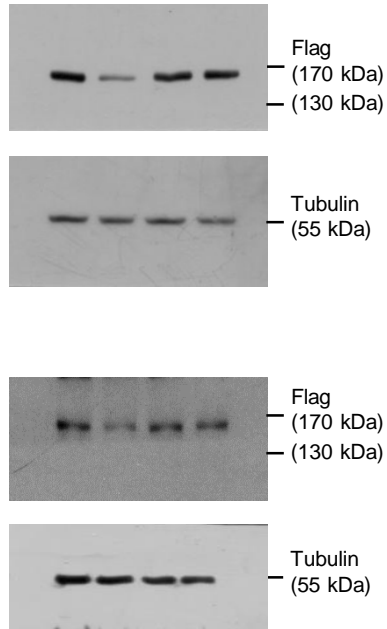

**e**

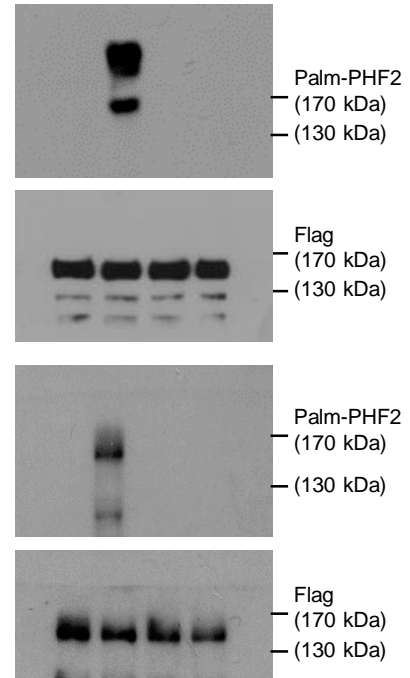

**Fig. 2**

**b**

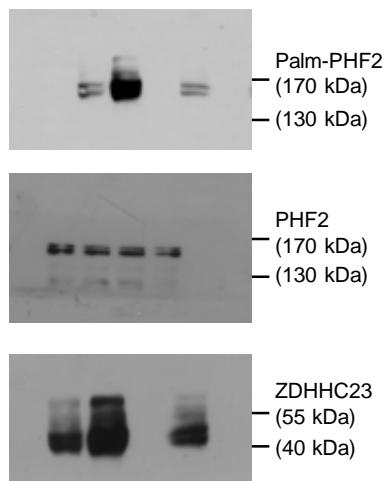

**c**

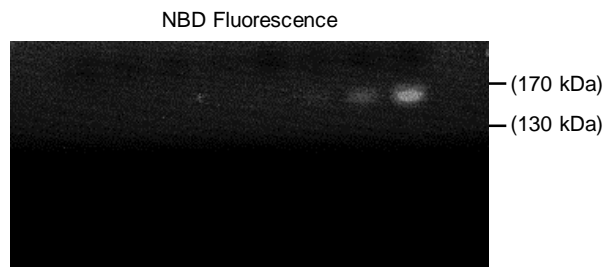

**g**

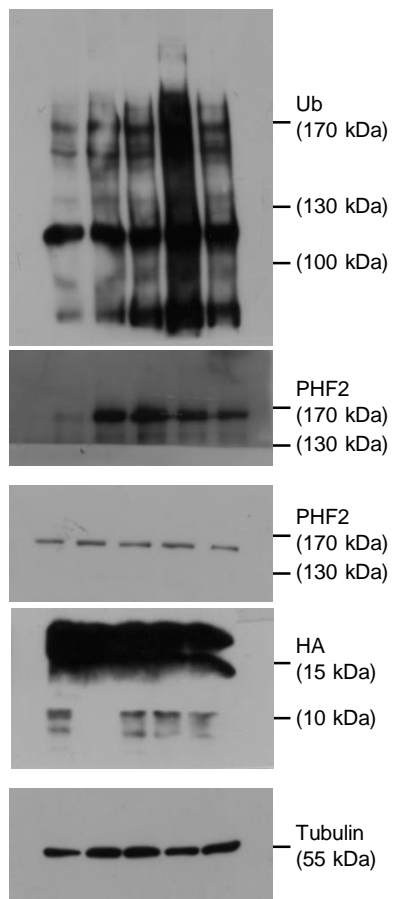

**h**

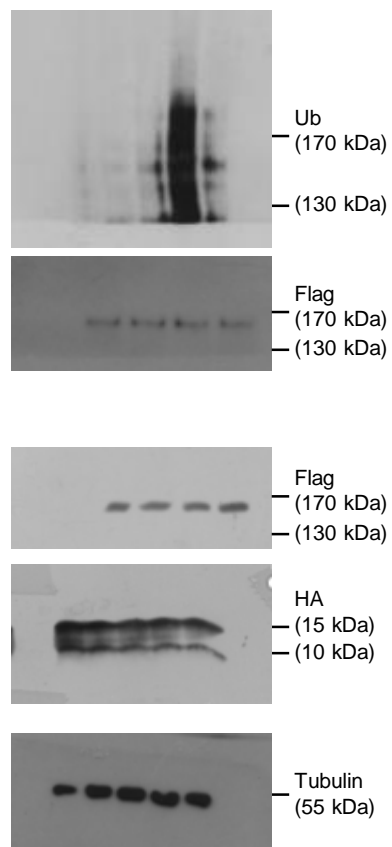

**Fig. 4**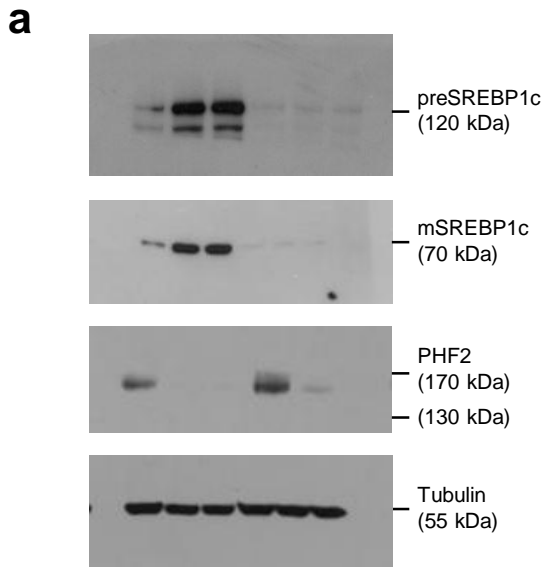**Fig. 5**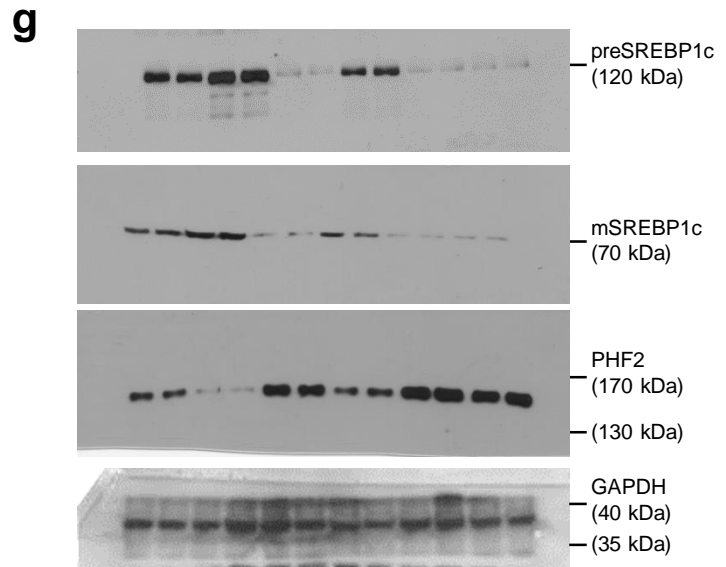**Fig. 6**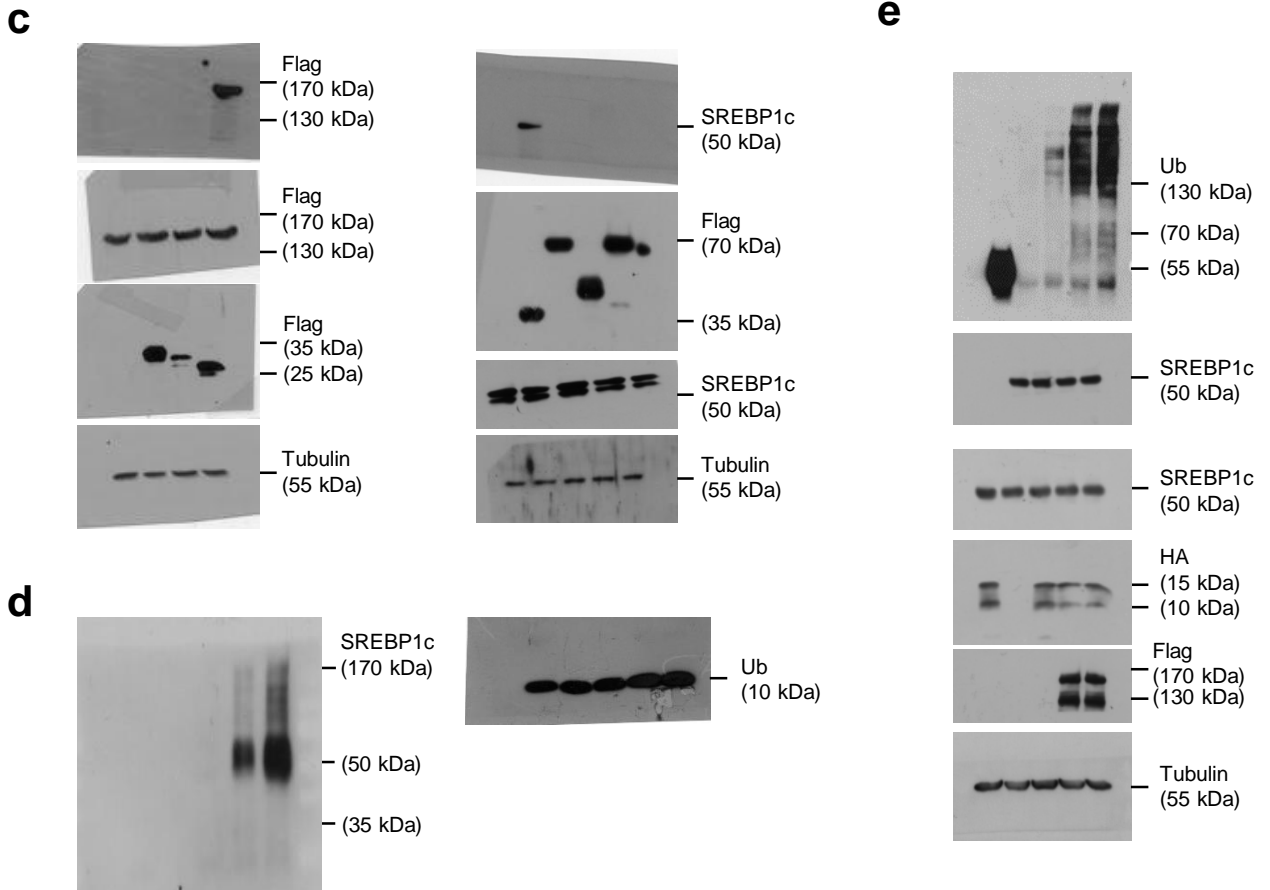

Supplement: 41467_2023_42170_MOESM6_ESM.pdf [file 41467_2023_42170_MOESM6_ESM.pdf]
